# Supplementary material
Source: PubMed Central journal article supplement (PMC4574255)
Supplement: supp_115.177709_FigureS2.pdf [file supp_115.177709_FigureS2.pdf]

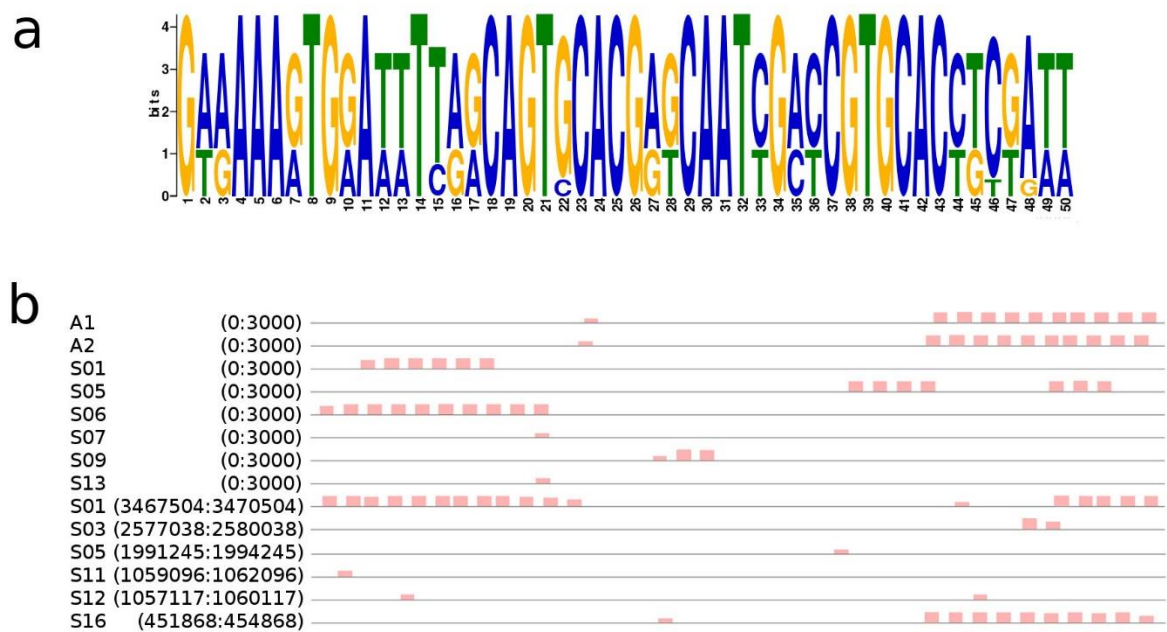

**Figure S2: Identification of sub-telomeric motifs in *Microbotryum lychnidis-dioicae*.** a) Consensus motif. b) Location in the 3000 bp of putative chromosomes edges. The genomic coordinates in bp are indicated in brackets.
