# Supplementary material
Source: PubMed Central journal article supplement (PMC4574255)
Supplement: supp_115.177709_FigureS4.pdf [file supp_115.177709_FigureS4.pdf]

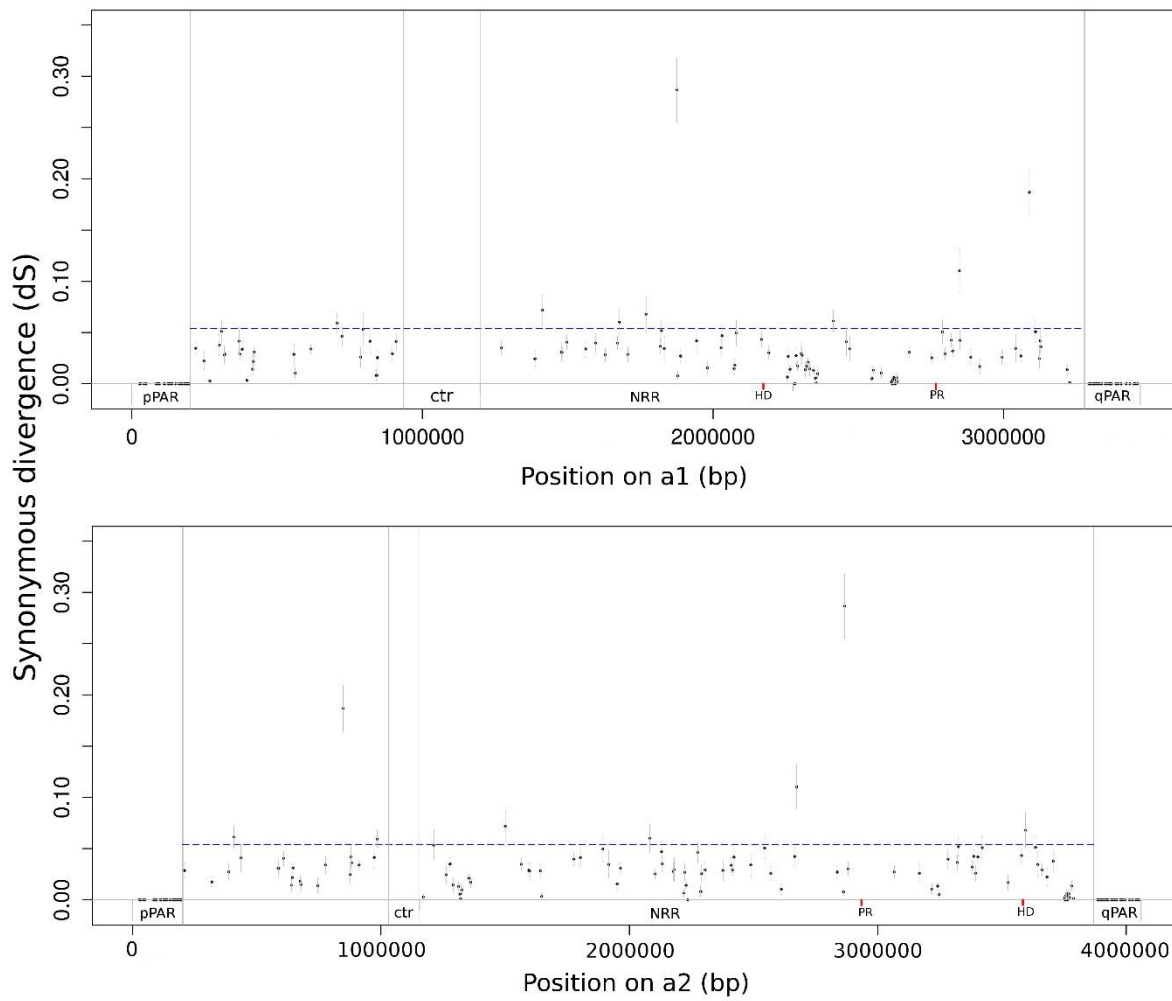

**Figure S4: Divergence between the *Microbotryum lychnidis-dioicae* mating-type chromosomes.** Synonymous divergence  $dS \pm SE$  is plotted against the genomic coordinates of the  $a_1$  (A) or  $a_2$  (B) alleles, for predicted genes with a gap-free codon alignment of more than 1000 bp. The boundaries between the pseudo-autosomal region (PAR) and the non-recombining regions (NRR) are indicated, as well as the locations of the mating-type loci (*PR*: pheromone receptor gene; *HD*: homeodomain genes). The mean value of  $dS$  in the NRR is shown as blue dotted lines.
