# Supplementary material
Source: PubMed Central journal article supplement (PMC4574255)
Supplement: supp_115.177709_FigureS6.pdf [file supp_115.177709_FigureS6.pdf]

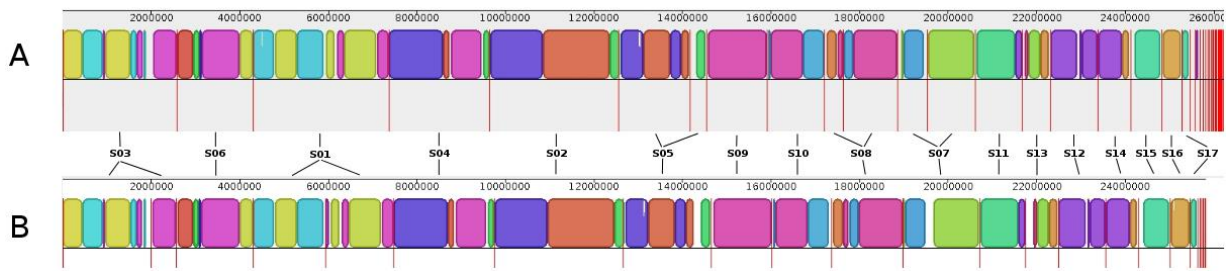

**Figure S6:** Autosomal contigs from the  $a_1$  and  $a_2$  assemblies, aligned with Mauve {Darling, 2010 #146}, illustrating their synteny. The contigs of  $a_1$  (A) and  $a_2$  (B) are separated by vertical red lines and the locally collinear blocks (LCBs) are represented as colored blocs. A couple of  $a_1$  contigs were split into two contigs in the  $a_2$  assembly (i.e., at position 2MB and 6MB), and conversely (at 14MB and 18MB). In these cases where an autosomal contig was larger in the  $a_1$  or in the  $a_2$  assembly, the largest contig was selected to resolve the final reference assembly (Figure 2). Contig names are indicated as in Figure 2, except the S18 that is one of the small contigs at right. The few short degenerate contigs at right were disregarded, likely resulting from the incorrect editing of reads.
