# Supplementary material
Source: PubMed Central journal article supplement (PMC4574255)
Supplement: supp_115.177709_FigureS7.pdf [file supp_115.177709_FigureS7.pdf]

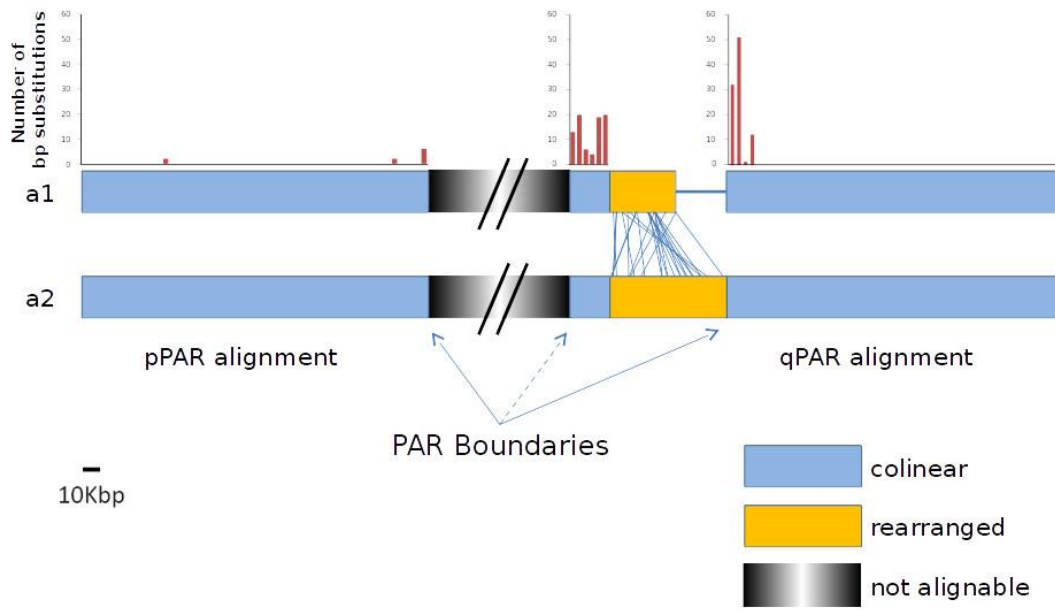

**Figure S7: Map of the base-pair substitutions in pseudo-autosomal regions of the *Microbotryum lychnidis-dioicae* mating-type chromosomes. A collinear region of 23 kb in the non-recombining region is identified close to the qPAR boundary.**
